# Supplementary material for: Monoclonal B-Cell Lymphocytosis and Chronic Lymphocytic Leukemia
Source: Atypon-hosted journal article supplement (doi:10.1056/nejmoa075290), 2008-08-06
Supplement: nejm_rawstron_575sa1.pdf [file nejm_rawstron_575sa1.pdf]

## Supplementary Appendix

This appendix has been provided by the authors to give readers additional information about their work.

Supplement to: Rawstron AC, Bennett FL, O'Connor SJM, et al. Monoclonal B-cell lymphocytosis and chronic lymphocytic leukemia. *N Engl J Med* 2008;359:575-83.

## ***Supplement***

Cases with a clonal B-cell excess (kappa:lambda ratio < 1:1 or > 2.1:1) were assessed with an extended panel as follows. For cases with a lymphocytosis,  $5 \times 10^5$  cells were incubated for 30 minutes with 5  $\mu$ l each of anti-CD19 Phycoerythrin (PE)-Cyanin5.5 (Cy5.5)\*, and FITC/PE: CD3/CD3 (control), CD20<sup>†</sup>/CD5, CD10<sup>†</sup>/CD38<sup>†</sup>, kappa/lambda, FMC7<sup>‡</sup>/CD22<sup>‡</sup>, CD11a/CD23, IgM<sup>†</sup>/IgD<sup>†</sup>, and IgG<sup>†</sup>/CD79b<sup>†</sup>. For cases with a normal blood count,  $5 \times 10^5$  cells were incubated for 30 minutes with 5  $\mu$ l each of anti-CD19 Phycoerythrin (PE)-Cyanin5.5 (Cy5.5)\*, anti-CD5 Allophyocyanin (APC)<sup>†</sup>, and FITC/PE: CD20<sup>†</sup>/CD79b<sup>†</sup>, FMC7<sup>‡</sup>/CD23. Antibody suppliers were: \* Invitrogen, Paisley, UK; † BD Biosciences, Oxford, UK; ‡ Beckman Coulter, High Wycombe, UK; § Chemicon Europe Ltd., Chandlers Ford, UK; all other reagents were prepared in-house.

Cells were washed, acquired using a FACSort cytometer and analyzed using CELLQuest software (BD Biosciences) as reported previously <sup>5</sup>.
